# Supplementary material
Source: publisher site journal article supplement (https://www.spandidos-publications.com/5561/downloadSupplementary)
Supplement: Supplementary file 1 [file downloadSupplementary]

Table SI. ROC curve analysis of CTLA4 and HVEM gene expression.

| ROC parameters                 | CTLA4                | HVEM                |
|--------------------------------|----------------------|---------------------|
| AUC                            | 0.6914062            | 0.7421875           |
| SE.AUC                         | 0.1028465            | 0.09728576          |
| Lower Limit                    | 0.4898309            | 0.5515109           |
| Upper Limit                    | 0.8929816            | 0.9328641           |
| P-value                        | 0.06273181           | <b>0.01279429</b>   |
| Cut-off point (Youden's index) | 0.00283              | 0.06055             |
| Sensitivity                    | 0.688 (0.413-0.890)  | 0.625 (0.354-0.848) |
| Specificity                    | 0.875 (0.617-0.984)  | 1.000 (0.794-NaN)   |
| Positive predictive value      | 0.846 (0.558-0.953)  | 1.000 (0.707-1.000) |
| Negative predictive value      | 0.737 (0.473-0.962)  | 0.727 (0.468-NaN)   |
| Positive likelihood ratio      | 5.500 (1.443-20.959) | Inf (NaN-Inf)       |
| Negative likelihood ratio      | 0.357 (0.169-0.756)  | 0.375 (0.199-0.706) |

Bold indicates a statistically significant result. ROC, receiver operating characteristic; CTLA4, cytotoxic T-lymphocyte-associated antigen 4; HVEM, herpesvirus entry mediator.

Table SII. Expression level of CTLA4 and HVEM in patients with malignant BC compared with non-malignant controls in association with the clinicopathological characteristics of patients.

| Parameters                 | Categories        | CTLA4                           |       |            |       |              | HVEM                            |       |            |       |              |
|----------------------------|-------------------|---------------------------------|-------|------------|-------|--------------|---------------------------------|-------|------------|-------|--------------|
|                            |                   | Relative expression fold change | SEM   | Median     | IQR   | P-value      | Relative expression fold change | SEM   | Median     | IQR   | P-value      |
| Hormone receptor phenotype | Luminal-like      | 1.247                           | 0.307 | 1.211      | 1.347 | 0.425        | 1.206                           | 0.239 | 1.090      | 0.669 | 0.414        |
|                            | HER2-enriched     | 5.984                           | 0.243 | 5.984      | 0.0   | <b>0.002</b> | 3.530                           | 0.209 | 3.530      | 0.0   | <b>0.009</b> |
|                            | Triple negative   | 1.795                           | 0.101 | 1.890      | 0.380 | 0.074        | 2.070                           | 0.221 | 1.727      | 0.709 | <b>0.016</b> |
| ER status                  | ER <sup>+</sup>   | 1.247                           | 0.307 | 1.211      | 1.347 | 0.425        | 1.206                           | 0.239 | 1.090      | 0.669 | 0.414        |
|                            | ER <sup>-</sup>   | 1.945                           | 0.142 | 1.956      | 0.363 | <b>0.030</b> | 2.005                           | 0.186 | 1.719      | 0.536 | <b>0.012</b> |
| PR status                  | PR <sup>+</sup>   | 1.247                           | 0.307 | 1.211      | 1.347 | 0.425        | 1.206                           | 0.239 | 1.090      | 0.669 | 0.414        |
|                            | PR <sup>-</sup>   | 1.945                           | 0.142 | 1.956      | 0.363 | <b>0.030</b> | 2.005                           | 0.186 | 1.719      | 0.536 | <b>0.012</b> |
| HER2 status                | HER2 <sup>+</sup> | 1.346                           | 0.299 | 1.492      | 1.832 | 0.274        | 1.245                           | 0.221 | 1.136      | 0.721 | 0.321        |
|                            | HER2 <sup>-</sup> | 1.795                           | 0.101 | 1.890      | 0.380 | 0.074        | 2.070                           | 0.221 | 1.727      | 0.709 | <b>0.016</b> |
| Lymph node involvement     | Negative          | 1.941                           | 0.254 | 2.021      | 1.228 | <b>0.018</b> | 1.691                           | 0.218 | 1.615      | 0.173 | <b>0.028</b> |
|                            | Positive          | 1.007                           | 0.504 | 1.069      | 0.359 | 0.989        | 1.580                           | 1.163 | 2.121      | 1.416 | 0.347        |
| Size of tumor, cm          | ≤2                | 1.320                           | 0.372 | 1.410      | 1.651 | 0.364        | 1.401                           | 0.304 | 1.292      | 1.017 | 0.197        |
|                            | >2                | 1.665                           | 0.285 | 1.831      | 0.662 | 0.107        | 1.580                           | 0.303 | 1.614      | 0.266 | 0.106        |
| Tumor grade                | I                 | 0.710                           | 0.243 | 0.710      | 0.0   | 0.494        | 0.705                           | 0.209 | 0.705      | 0.0   | 0.419        |
|                            | II                | 2.642                           | 0.318 | 1.657      | 1.259 | 0.281        | 1.276                           | 0.164 | 1.470      | 0.624 | 0.284        |
|                            | III               | 1.776                           | 0.279 | 1.890      | 1.001 | 0.058        | 1.888                           | 0.320 | 1.711      | 1.622 | <b>0.025</b> |
| BC histotypes              | DCIS              | 1.356                           | 0.220 | 1.567      | 1.223 | 0.196        | 1.339                           | 0.176 | 1.470      | 0.732 | 0.141        |
|                            | LCIS              |                                 |       | No samples |       |              |                                 |       | No samples |       |              |
| Vascular invasion          | Negative          | 1.674                           | 0.291 | 2.021      | 0.756 | 0.070        | 1.677                           | 0.292 | 1.548      | 0.988 | <b>0.046</b> |
|                            | Positive          | 2.182                           | 0.411 | 2.271      | 0.630 | 0.135        | 1.696                           | 0.013 | 1.696      | 0.015 | 0.228        |
| Margin                     | Negative          | 1.728                           | 0.271 | 1.956      | 1.240 | <b>0.046</b> | 1.676                           | 0.261 | 1.614      | 0.785 | <b>0.036</b> |
|                            | Positive          |                                 |       | No samples |       |              |                                 |       | No samples |       |              |

Bold indicates a statistically significant result. CTLA4, T-lymphocyte-associated antigen 4; HVEM, herpesvirus entry mediator; SEM, standard error of the mean; IQR, interquartile range HER2, human epidermal growth factor receptor-2; ER, estrogen receptor; PR, progesterone receptor.
